# Supplementary material for: Comprehensive analysis of microRNA expression in regionalized human neural progenitor cells reveals microRNA-10 as a caudalizing factor
Source: Oxford University Press journal article supplement (doi:10.1242/dev.122747), 2015-09-15
Supplement: dev122747supp.pdf [file dev122747supp.pdf]

## SUPPLEMENTARY FIGURES

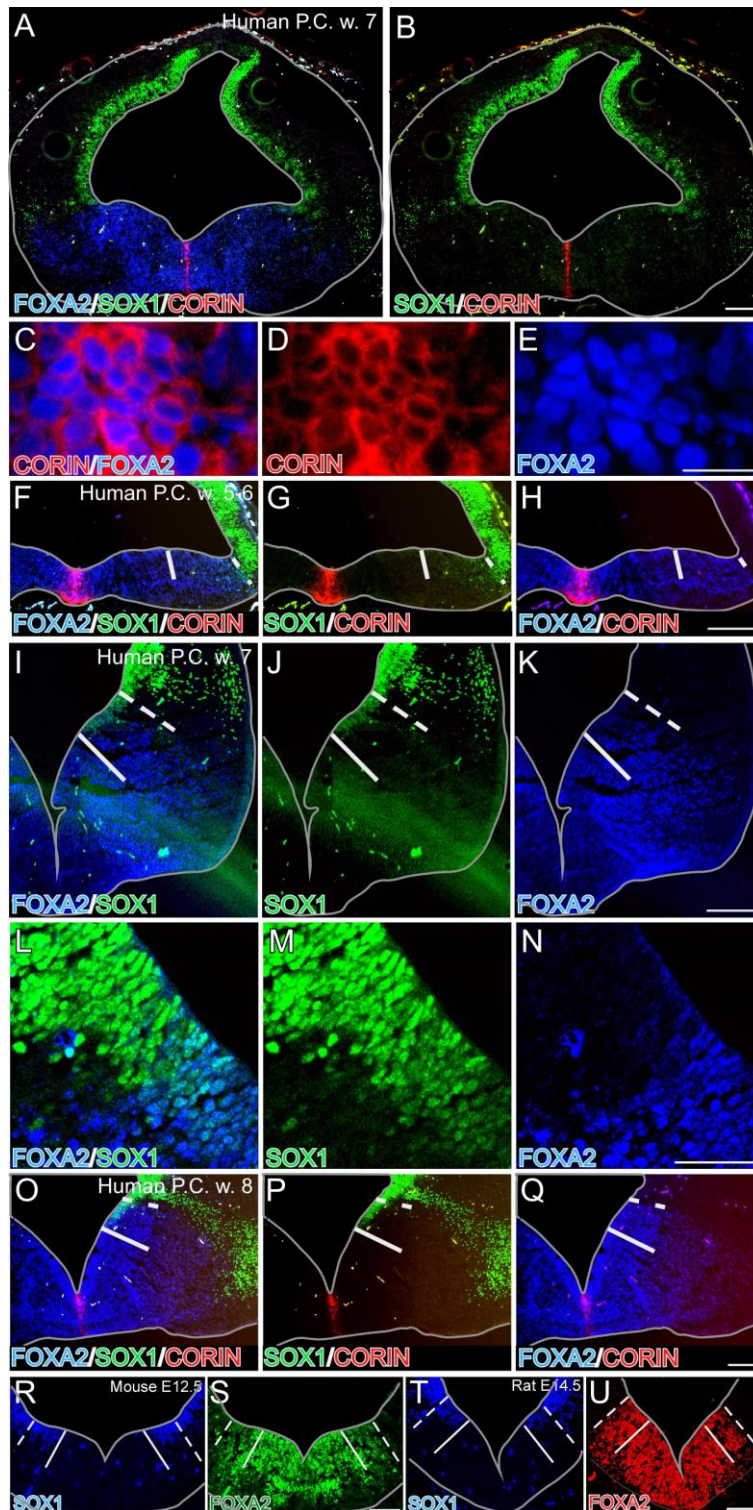

**Figure S1. The human midbrain expresses SOX1 and CORIN**

SOX1 positive cells were found situated in the human mesencephalon within the ventricular zone with two exceptions, the roof plate and the FOXA2 positive floor plate (FP) (A-B).

CORIN was shown to solely be restricted to the FP cells in the midline (A-B, F-H, O-Q) and were shown to co-express FOXA2 (C-E). At week 5-6 p.c., SOX1 positive cells were found within the lateral FOXA2 domain, between the dashed and solid marking lines, although the level of expression appeared lower compared to the more lateral SOX1 positive domain (F-H). This difference in SOX1 expression seemed to increase over time and at p.c. week 7 to 8, no difference could be observed (I-N, O-Q). The lateral FOXA2/SOX1 double positive domain was also found in mice and rats (R-U). Scale bars: A-B, F-K, O-Q, 200  $\mu\text{m}$ ; C-E; 20  $\mu\text{m}$ ; L-N, R-U; 100  $\mu\text{m}$ .

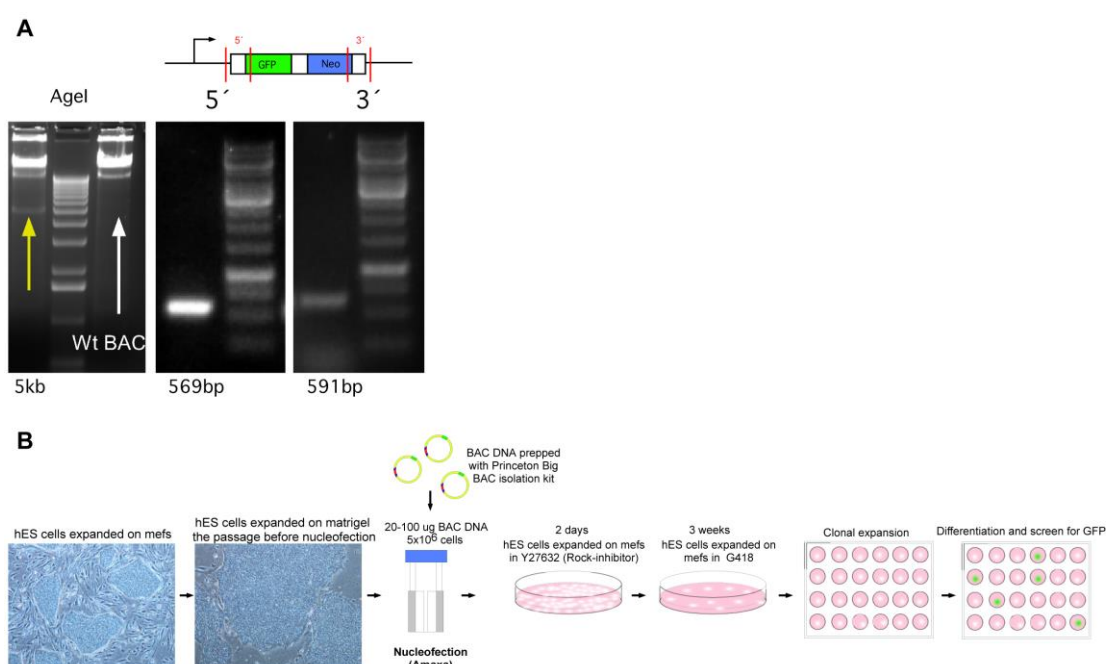

**Figure S2. Validation of the human SOX1-GFP construct and generation of a BAC**

**reporter cell line.** (A) Proper eGFP-pSV40-Neo<sup>R</sup> reporter cassette insertion was validated with restriction enzyme and PCR analysis. (B) The BAC based SOX1-GFP reporter construct was introduced into the hESCs by nucleofection, followed by clonal expansion and screening during differentiation. Scale bar: 100  $\mu$ m.



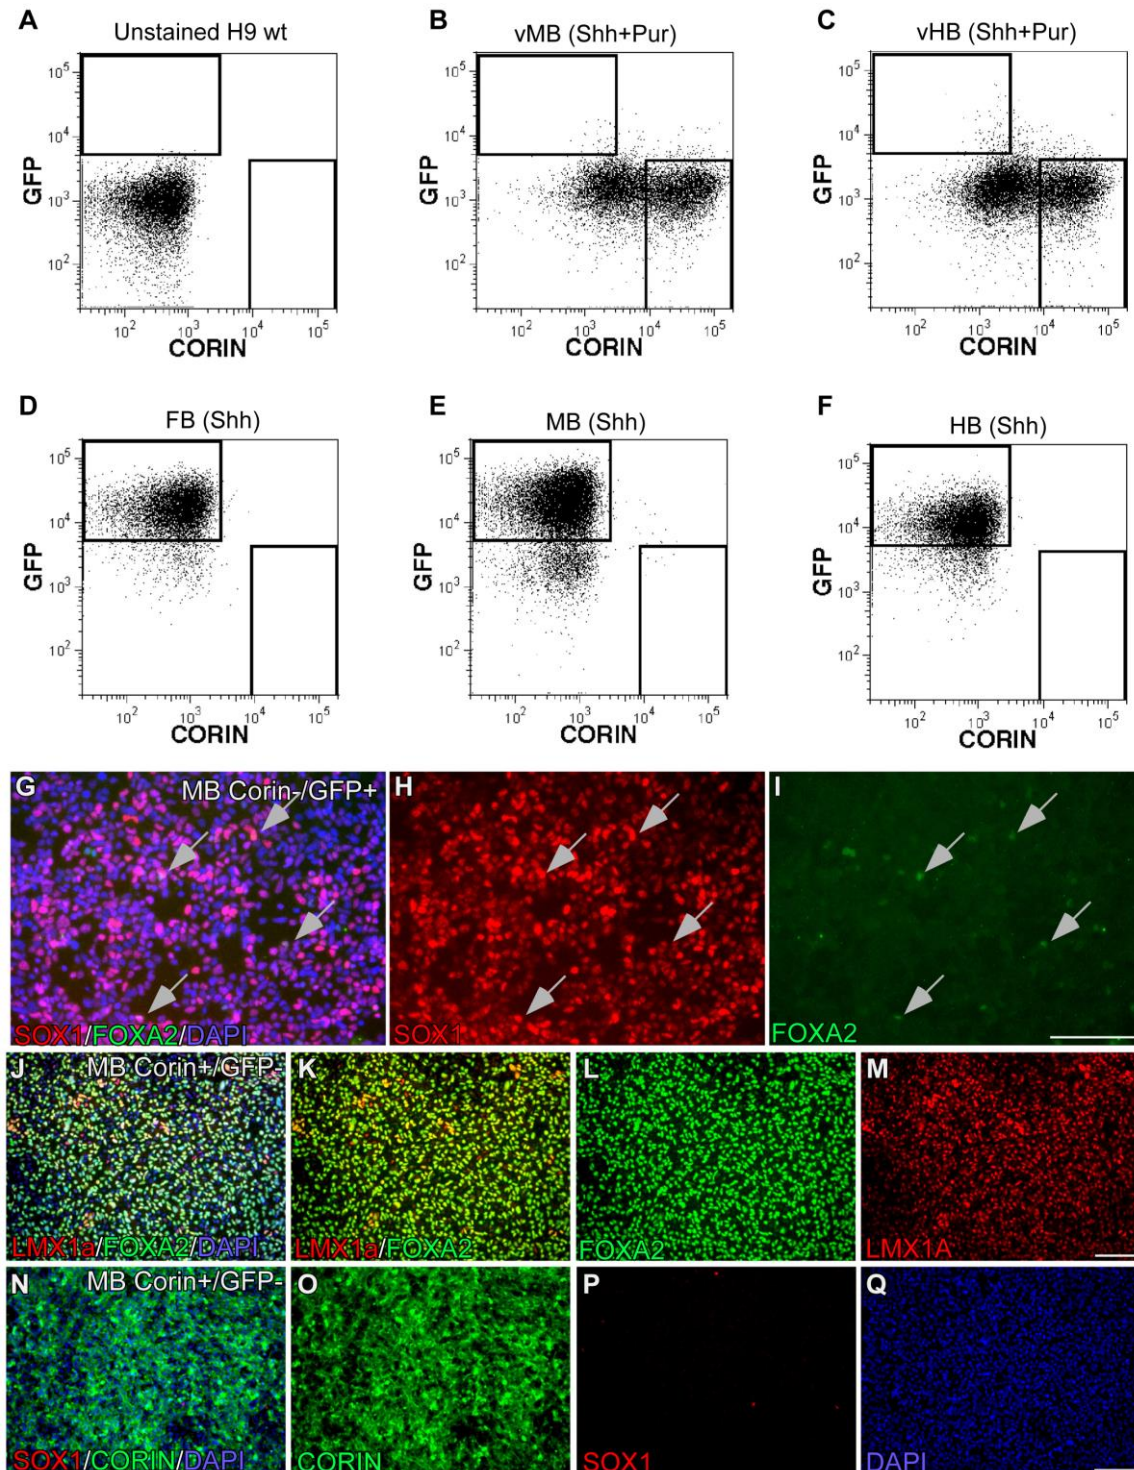

**Figure S3. The *SOX1*-GFP reporter hESC line can readily differentiate into MB NE and FP cells**

(A-C) When adding the SHH agonist Purmorphamine to FB, MB and HB differentiation cultures from day 0-9 the cells were effectively ventralized, as the majority of the cells were

GFP negative at day 14, and MB and HB FP cells started to express high levels of the FP marker CORIN. (D-F) This is in contrast to differentiation without Purmorphamine, where the majority of cells was GFP+ at day 14 and had a very low expression of CORIN. (G-I) Isolated GFP+/CORIN- MB NE populations were shown to highly express SOX1 with only a few cells being positive for the FP marker FOXA2 and the majority of those being co-labeled with SOX1 (arrows). (J-M) In contrast, the GFP-/CORIN+ FP cells were rich in FOXA2 expressing cells and in the MB condition FOXA2 was efficiently co-labeled with LMX1A. (N-Q) The isolated GFP-/CORIN+ populations were negative for SOX1.

**Table S1**

[Click here to Download Table S1](#)

**Table S2**

[Click here to Download Table S2](#)

**Table S3**

[Click here to Download Table S3](#)

**Table S4**

[Click here to Download Table S4](#)

**Table S5**

[Click here to Download Table S5](#)

**Table S6.** Human specific primers

|       |   |                          |
|-------|---|--------------------------|
| Corin | F | CATATCTCCATCGCCTCAGTTG   |
|       | R | GGCAGGAGTCCATGACTGT      |
| FoxA2 | F | CCGTTCTCCATCAACAACCT     |
|       | R | GGGGTAGTGCATCACCTGTT     |
| FoxG1 | F | TGGCCCATGTCGCCCTTCCT     |
|       | R | GCCGACGTGGTGCCGTTGTA     |
| Gbx2  | F | GTTCCCGCCGTCGCTGATGAT    |
|       | R | GCCGGTGTAGACGAAATGGCCG   |
| GFP   | F | CTGCTGCCCGACAACCAC       |
|       | R | ACCATGTGATCGCGCTTCTC     |
| HoxA2 | F | CGTCGCTCGCTGAGTGCCTG     |
|       | R | TGTCGAGTGTGAAAGCGTCGAGG  |
| HoxA4 | F | ACGCTCTGTTTGTCTGAGCGCC   |
|       | R | AGAGGCCGAGGCCGAATTGGA    |
| Lhx1  | F | AGGTGAAACACTTTGCTCCG     |
|       | R | CTCCAGGGAAGGCAAACCTCT    |
| Lmx1a | F | CGCATCGTTTCTTCTCCTCT     |
|       | R | CAGACAGACTTGGGGCTCAC     |
| Lmx1b | F | CTTAACCAGCCTCAGCGACT     |
|       | R | TCAGGAGGCGAAGTAGGAAC     |
| Otx2  | F | ACAAGTGGCCAATTCACTCC     |
|       | R | GAGGTGGACAAGGGATCTGA     |
| Pax6  | F | TGGTATTCTCTCCCCCTCCT     |
|       | R | TAAGGATGTTGAACGGGCAG     |
| Shh   | F | CCAATTACAACCCCGACATC     |
|       | R | AGTTTCACTCCTGGCCACTG     |
| Sox1  | F | GGGAAAACGGGCAAATAAT      |
|       | R | TTTTGCGTTCACATCGGTTA     |
| Sox17 | F | CCAGACCGCGACAGGCCAGAAC   |
|       | R | AGTGAGGCACTGAGATGCCCCGAG |

**Table S7.** List of antibodies

| <b>Species</b> | <b>Antibody</b> | <b>Dilution</b> | <b>Company</b> | <b>Order no.</b> |
|----------------|-----------------|-----------------|----------------|------------------|
| goat           | Foxa2           | 1:600           | Santa Cruz     | sc-6554          |
| mouse          | Map2            | 1:500           | Sigma          | M1406            |
| rabbit         | Lmx1a           | 1:2000          | Millipore      | AB10533          |
| mouse          | Oct3/4          | 1:500           | Chemicon       | AB9558           |
| rat            | Corin           | 1:200           | R&D Systems    | MAB2209          |
| goat           | Otx2            | 1:2000          | Neuromic       | GT15095          |
| goat           | Sox17           | 1:100           | R&D Systems    | MAB1924          |
| rabbit         | Brachury        | 1:200           | Abcam          | ab20680          |
| rb             | Sox1            | 1:200           | Cellsignaling  | 41945            |
| chicken        | GFP             | 1:1000          | Abcam          | ab13970          |
